# Supplementary material for: A dedicated diribonuclease resolves a key bottleneck for the terminal step of RNA degradation
Source: eLife. 2019 Jun 21;8:e46313. doi: 10.7554/eLife.46313 (PMC6613908; doi:10.7554/eLife.46313)
Supplement: Figure 1—source data 1. [file elife-46313-fig1-data1.xlsx]

## Sheet: Figure 1 data
Figure 1B - 5 nM Orn with 1 µM substrate
minutes	pGpG			AGG (3-nt)			AAGG (4-nt)			AAAGG (5-nt)			AAAAGG (6-nt)			AAAAAGG (7-nt)
0	100	100	100	100	100	100	100	100	100	100	100	100	100	100	100	100	100	100
0.3	77.9372	79.0456	93.6184	91.1203	95.7563	98.446	101.766	100.306	94.1545	115.229	98.7644	99.0357	102.56	99.3067	100.436	91.8919	93.1404	97.6842
1	64.6647	57.2071	57.2831	96.583	94.7307	100.825	95.832	101.179	96.8001	116.397	100.413	97.2077	103.49	99.4731	100.663	94.2491	94.0677	100.799
3	41.6697	32.9428	30.357	111.035	100.534	98.9597	95.7016	90.6814	95.6459	116.342	98.208	100.124	104.61	99.0237	102.466	95.7034	97.4739	98.4883
10	13.0917	9.9419	3.45072	103.873	103.012	95.1439	97.3326	93.8679	99.1783	120.328	96.63	102.005	100.97	102.22	103.066	102.253	95.2095	98.2303
30	2.99987	3.20085	0.246316	114.948	98.6067	89.4585	99.702	99.3283	92.5209	118.9	98.7089	99.2136	101.635	100.323	94.6207	96.0429	98.9971	97.6765
Figure 1D - 1 µM Orn with 1 µM substrate
minutes	pGpG			AGG (3-nt)			AAGG (4-nt)			AAAGG (5-nt)			AAAAGG (6-nt)			AAAAAGG (7-nt)
0	100	100	100	100	100	100	100	100	100	100	100	100	100	100	100	100	100	100
0.3	1.47333	2.97401	3.85027	91.5329	94.1812	92.1533	100.744	98.1188	101.957	97.7432	101.448	100.984	103.231	104.311	100.917	103.676	105.344	99.1481
1	0.0857496	0.0964199	0.210636	74.4675	75.5143	85.5625	102.149	96.572	97.777	98.401	100.786	100.591	102.023	102.78	98.4618	110.64	103.105	101.659
3	0.0939811	0.10347	0.0785313	43.2721	30.7652	51.5682	88.7279	83.1673	80.7701	95.1132	98.1815	97.4753	93.6131	93.3387	99.1288	99.4888	100.847	86.7373
10	0.0999795	0.0961457	0.0686327	4.25384	1.85322	1.98132	47.2102	40.102	31.7188	82.9421	86.5809	79.3106	80.6284	83.1125	74.2117	87.2031	89.0979	79.9975
30	0.0913179	0.319229	0.12115	0.915622	1.07086	0.811438	5.38017	5.76036	2.40868	58.169	66.2644	49.17	54.1276	52.8846	34.5682	65.1595	65.69	49.2978
