# Supplementary material for: A dedicated diribonuclease resolves a key bottleneck for the terminal step of RNA degradation
Source: eLife. 2019 Jun 21;8:e46313. doi: 10.7554/eLife.46313 (PMC6613908; doi:10.7554/eLife.46313)
Supplement: Figure 2—source data 1. [file elife-46313-fig2-data1.xlsx]

## Sheet: Sheet1
Figure 2 – source data 1. Data collection and refinement statistics.a
Protein	OrnVc	OrnVc	OrnVc	OrnVc	OrnVc	OrnVc	OrnVc	REXO2	REXO2	REXO2
Substrate	pGpG	pApA	pApG	pGpA	pGpC	pCpG	pCpU	pGpG	pApA	pApG
Data collection
Wavelength	0.977	0.977	0.977	0.977	0.977	0.977	0.977	0.977	0.977	0.977
Resolution range	29.4 - 1.5 (1.56 - 1.50)	23.7 - 1.62 (1.68 - 1.62)	38.9 - 1.53 (1.59 - 1.53)	47.3 - 1.58 (1.64 - 1.58)	29.0 - 1.74 (1.80 - 1.74)	32.4 - 2.02 (2.09 - 2.02)	35.8 - 1.76 (1.82 - 1.76)	41.2 - 1.43 (1.48 - 1.43)	25.3 - 1.32 (1.36 - 1.32)	26.4 - 1.42 (1.47 - 1.42)
Space group	P 32 2 1	P 32 2 1	P 32 2 1	P 32 2 1	P 32 2 1	P 32 2 1	P 32 2 1	P 21 21 21	P 21 21 21	P 21 21 21
Unit cell a/b/c (Å)	89.9 89.9 59.7	89.4 89.4 59.5	89.7 89.7 59.5	89.6 89.6 59.7	88.7 88.7 59.8	89.0 89.0 59.9	89.1 89.1 60.1	45.8 87.3 123.8	45.9 87.3 124.2	45.8 87.4 124.3
Unit cell a/b/g (°)	90 90 120	90 90 120	90 90 120	90 90 120	90 90 120	90 90 120	90 90 120	90 90 90	90 90 90	90 90 90
Total reflections	533,852 (43,456)	424,370 (37,400)	499,153 (43,484)	324,122 (30,893)	341,973 (31,464)	220,944 (20,997)	337,101 (32,497)	697,560 (42,227)	876,046 (45,744)	754,926 (64,979)
Unique reflections	44,704 (4,399)	35,164 (3,462)	41,593 (4,056)	38,242 (3,736)	28,376 (2,753)	18,318 (1,797)	27,773 (2,754)	91,370 (8,272)	118,552 (11,359)	95,178 (9,301)
Multiplicity	11.9 (9.9)	12.1 (10.8)	12.0 (10.7)	8.5 (8.3)	12.1 (11.4)	12.1 (11.7)	12.1 (11.8)	7.6 (5.1)	7.4 (4.0)	7.9 (7.0)
Completeness (%)	99.9 (99.6)	99.9 (99.3)	99.8 (98.2)	99.7 (98.0)	99.8 (98.3)	99.9 (99.7)	100.0 (99.9)	99.0 (91.0)	99.6 (96.8)	99.8 (98.6)
I/sigma(I)	18.2 (1.7)	29.4 (1.9)	21.4 (2.0)	18.7 (1.9)	25.9 (1.9)	22.2 (2.1)	22.6 (2.2)	13.6 (1.5)	17.8 (1.7)	16.5 (2.2)
Wilson B-factor	15.98	26.32	18.37	22.94	30.18	37.21	30.56	12.17	12.62	14.23
CC1/2	1.00 (0.66)	1.00 (0.71)	1.00 (0.75)	1.00 (0.70)	1.00 (0.71)	1.00 (0.77)	1.00 (0.76)	1.00 (0.56)	1.00 (0.75)	1.00 (0.80)
Refinement
Reflections (R-free)	2,236 (220)	1,762 (177)	2,081 (201)	1,916 (188)	1,421 (137)	916 (81)	1,390 (137)	2,275 (206)	2,958 (284)	2,371 (230)
R-work	0.1467	0.1461	0.1452	0.1578	0.1545	0.1621	0.1605	0.1583	0.1528	0.1538
R-free	0.1601	0.1546	0.1579	0.1646	0.1698	0.1875	0.1835	0.1782	0.1702	0.1725
Non-hydrogen atoms	1861	1802	1843	1782	1778	1708	1737	3704	3862	3929
macromolecules	1553	1533	1534	1515	1551	1549	1526	3214	3338	3364
ligands	1	1	1	1	1	1	1	29	29	9
solvent	307	268	308	266	226	158	210	461	495	556
Protein residues	181	181	181	181	180	181	181	369	381	381
Rms (bonds)	0.005	0.006	0.006	0.006	0.005	0.006	0.006	0.006	0.005	0.005
Rms (angles)	0.84	0.82	0.84	1.15	0.84	0.84	0.85	0.81	0.83	0.83
Ramachandran
favored (%)	98.32	99.44	98.88	98.32	100	98.88	99.44	99.18	99.2	98.94
allowed (%)	1.68	0.56	1.12	1.68	0	1.12	0.56	0.82	0.8	1.06
outliers (%)	0	0	0	0	0	0	0	0	0	0
Rotamer outliers (%)	0	0	0	0	0	0.6	0.61	0	0.27	0
Clashscore	1.94	1.32	0.99	1	1.31	2.6	2.32	1.08	1.04	1.78
Average B-factor	21.83	32.63	24.51	29.4	36.37	43.95	36.31	18.45	19.57	22.59
macromolecules	19.18	30.2	21.73	27.15	34.67	43.14	34.8	16.6	17.67	20.33
ligands	14.6	24.65	16.01	20.33	31.09	48.74	48.05	33.16	31.27	55.54
solvent	35.24	46.55	38.37	42.28	48.09	51.82	47.28	30.42	31.7	35.68
aStatistics for the highest-resolution shell are shown in parentheses.
