# Supplementary material for: A dedicated diribonuclease resolves a key bottleneck for the terminal step of RNA degradation
Source: eLife. 2019 Jun 21;8:e46313. doi: 10.7554/eLife.46313 (PMC6613908; doi:10.7554/eLife.46313)
Supplement: Figure 2—source data 2. [file elife-46313-fig2-data2.xlsx]

## Sheet: Sheet1
Figure 2 – source data 2. Sequences used to calculate surface conservation and generate Weblogos.
Oligoribonuclease			RNase T
Strain	accession#a	%ID to OrnVcb	Strain	accession#a	%ID to OrnVcb
Vibrio cholerae	Q9KV17	100	Vibrio cholerae	Q9KT97	100
Escherichia coli	P0A784	68	Escherichia coli	P30014	69
Coxiella burnetii	Q83C93	59	Coxiella burnetii	Q83B16	46
Haemophilus influenzae	P45340	64	Haemophilus influenzae	P44639	59
Acinetobacter baumannii	V5VGJ9	59	Acinetobacter baumannii	D0CDY9	53
Xanthomonas campestris	Q8P8S1	55	Xanthomonas campestris	Q8PAG3	47
Pseudomonas aeruginosa	P57665	70	Pseudomonas aeruginosa	Q9HY82	63
Pseudomonas fluorescens	Q3KIZ7	69	Pseudomonas fluorescens	Q3K7J7	61
Azotobacter vinelandii	C1DLP5	66	Azotobacter vinelandii	C1DQV0	65
Shigella flexneri	Q83IJ9	67	Shigella flexneri	Q0T4C2	69
Legionella pneumophila	Q5ZRY0	62	Legionella pneumophila	Q5ZRB8	52
Mycobacterium tuberculosis	P9WIU1	43
Streptomyces coelicolor	P57666	51
Homo sapiens	Q9Y3B8	50
a: Based on Uniprot database (1); b: Based on ClustalOmega multi-sequence alignment scores (2).
References
1: The UniProt Consortium. (2017). UniProt: the universal protein knowledgebase. Nucleic Acids Res. 45(D1): D158-D169.
2: Sievers, F., Wilm, A., Dineen, D., Gibson, T.J., Karplus, K., Li, W., Lopez, R., McWilliam, H., Remmert, M., Söding, J., Thompson, J.D., Higgins, D.G. (2011). Fast, scalable generation of high-quality protein multiple sequence alignments using Clustal Omega. Mol Syst Biol. 7:539.
