# Supplementary material for: A dedicated diribonuclease resolves a key bottleneck for the terminal step of RNA degradation
Source: eLife. 2019 Jun 21;8:e46313. doi: 10.7554/eLife.46313 (PMC6613908; doi:10.7554/eLife.46313)
Supplement: Figure 3—figure supplement 4—source data 1. [file elife-46313-fig3-figsupp4-data1.xlsx]

## Sheet: Sheet1
Figure 3 - figure supplement 4.
Protein	Cleaveage product	Time (min)	Replicate 1	Replicate 2	Replicate 3	Average	Stdev
Vc Orn	pGpG	0	0.868837	0.945638	0.939246	0.917907	0.0426156
		3	0.142434	0.390133	0.299703	0.277423	0.125343
		5	0.0684723	0.20043	0.16	0.142968	0.0676077
		10	0.0298444	0.0610947	0.0558006	0.0489132	0.0167249
		20	0.0227852	0.0238775	0.0204195	0.0223607	0.00176765
		30	0.0217688	0.0209066	0.014972	0.0192158	0.00370044
D12A	pGpG	0	0.939513	0.926902	0.972069	0.946161	0.0233059
		3	0.932814	0.948021	0.988488	0.956441	0.0287761
		5	0.927629	0.940206	0.992619	0.953485	0.0344698
		10	0.924015	0.927915	0.991384	0.947772	0.0378199
		20	0.912437	0.921849	0.989069	0.941118	0.0417924
		30	0.903963	0.904929	0.985444	0.931445	0.0467664
L18A	pGpG	0	0.926929	0.935582	0.975527	0.946013	0.0259239
		3	0.934242	0.931378	0.98471	0.95011	0.0299986
		5	0.935272	0.935368	0.987155	0.952598	0.0299266
		10	0.932503	0.932762	0.990094	0.951786	0.0331757
		20	0.927031	0.937767	0.989457	0.951418	0.0333768
		30	0.935285	0.932121	0.980481	0.949296	0.0270538
D59A	pGpG	0	0.926929	0.935582	0.975527	0.946013	0.0259239
		3	0.934242	0.931378	0.98471	0.95011	0.0299986
		5	0.935272	0.935368	0.987155	0.952598	0.0299266
		10	0.932503	0.932762	0.990094	0.951786	0.0331757
		20	0.927031	0.937767	0.989457	0.951418	0.0333768
		30	0.935285	0.932121	0.980481	0.949296	0.0270538
W61A	pGpG	0	0.957693	0.957935	0.954752	0.956793	0.00177174
		3	0.953885	0.956186	0.958315	0.956129	0.00221542
		5	0.955523	0.947665	0.958632	0.95394	0.00565241
		10	0.961055	0.961091	0.957161	0.959769	0.00225843
		20	0.952213	0.959544	0.947293	0.953017	0.00616493
		30	0.945212	0.951406	0.946137	0.947585	0.00334121
H66A	pGpG	0	0.952781	0.936423	0.985428	0.958211	0.0249498
		3	0.920743	0.897066	0.898313	0.905374	0.0133249
		5	0.898834	0.88141	0.837967	0.872737	0.0313469
		10	0.861853	0.852707	0.743896	0.819485	0.0656216
		20	0.81145	0.800879	0.595299	0.735876	0.121858
		30	0.777258	0.764591	0.496939	0.679596	0.158312
Q111A	pGpG	0	0.959932	0.928834	0.976517	0.955094	0.0242071
		3	0.925903	0.930808	0.943442	0.933385	0.00904889
		5	0.908845	0.928389	0.915662	0.917632	0.0099197
		10	0.878985	0.903279	0.876011	0.886092	0.0149584
		20	0.856256	0.881654	0.831373	0.856428	0.0251409
		30	0.843616	0.871153	0.822577	0.845782	0.0243606
Y129A	pGpG	0	0.953477	0.952588	0.936452	0.947506	0.00958303
		3	0.950294	0.945312	0.92268	0.939428	0.0147174
		5	0.939568	0.955059	0.912501	0.93571	0.0215396
		10	0.939322	0.954198	0.916621	0.936713	0.0189241
		20	0.942596	0.956117	0.916805	0.938506	0.0199722
		30	0.942125	0.952874	0.925798	0.940265	0.0136334
R130A	pGpG	0	0.965534	0.935256	0.962418	0.954403	0.0166544
		3	0.941554	0.886981	0.948898	0.925811	0.0338277
		5	0.921063	0.850417	0.971039	0.914173	0.0606054
		10	0.891681	0.840781	0.976853	0.903105	0.0687518
		20	0.879782	0.819647	0.976669	0.892033	0.0792247
		30	0.93593	0.836323	0.971643	0.914632	0.0701291
H158A	pGpG	0	0.947165	0.956868	0.951954	0.951996	0.00485171
		3	0.958065	0.958204	0.955525	0.957265	0.00150829
		5	0.95978	0.956987	0.957317	0.958028	0.00152641
		10	0.958861	0.960527	0.951209	0.956865	0.00496924
		20	0.95824	0.965701	0.952174	0.958705	0.00677581
		30	0.959336	0.964439	0.950415	0.958063	0.00709821
