# Supplementary material for: A dedicated diribonuclease resolves a key bottleneck for the terminal step of RNA degradation
Source: eLife. 2019 Jun 21;8:e46313. doi: 10.7554/eLife.46313 (PMC6613908; doi:10.7554/eLife.46313)
Supplement: Figure 4—figure supplement 1—source data 1. [file elife-46313-fig4-figsupp1-data1.xlsx]

## Sheet: Sheet1
Figure 4 - figure supplement 1
Panel A
	Cleaveage product	Time (min)	Replicate 1	Replicate 2	Average	Stdev
Control	pGpG	0	0.964066	0.966946	0.965506	0.00203646
		1	0.0814176	0.184118	0.132768	0.0726204
		3	0.096225	0.0741041	0.0851646	0.0156418
		5	0.0506725	0.0557685	0.0532205	0.00360343
		10	0.0442488	0.0445224	0.0443856	0.000193436
		20	0.0458305	0.0354208	0.0406257	0.00736072
GMP	pGpG	0	0.965704	0.952422	0.959063	0.00939196
		1	0.159332	0.203566	0.181449	0.0312785
		3	0.0465369	0.0516651	0.049101	0.00362618
		5	0.036428	0.033652	0.03504	0.00196288
		10	0.0375433	0.0332778	0.0354105	0.00301614
		20	0.0339016	0.045844	0.0398728	0.00844454
pAp	pGpG	0	0.957388	0.954428	0.955908	0.00209297
		1	0.106441	0.184594	0.145517	0.0552624
		3	0.0483777	0.0496976	0.0490377	0.000933324
		5	0.0385795	0.0337395	0.0361595	0.00342244
		10	0.0323944	0.0267466	0.0295705	0.0039936
		20	0.0308745	0.0269872	0.0289309	0.00274876
GpG	pGpG	0	0.966845	0.970767	0.968806	0.00277315
		1	0.17678	0.290922	0.233851	0.0807112
		3	0.0522623	0.0693403	0.0608013	0.012076
		5	0.0360922	0.0463766	0.0412344	0.00727213
		10	0.0271476	0.0343185	0.0307331	0.00507056
		20	0.0228771	0.0304689	0.026673	0.00536823
Panel B
	Replicate 1	Replicate 2	Replicate 3	Replicate 4	Replicate 5	Average	Stdev
Control	0.346094	0.389218	0.307852	0.324353	0.382697	0.350043	0.0355549
pGpG	0	0	0	0	0	0	0
GpG	0.351066	0.348281	0.320672	0.372051	0.351097	0.348633	0.0183188
Panel C
Orn concentration (µM)	Replicate 1	Replicate 2	Replicate 3	Replicate 4	Replicate 5	Replicate 6	Average	Stdev
0	0	0	0	0	0	0	0	0
0.0302734	0	0	0	0	0	0	0	0
0.0605469	0	0	0	0	0	0	0	0
0.121094	0	0	0	0	0	0	0	0
0.242188	0	0	0	0	0	0	0	0
0.484375	0	0	0	0	0	0	0	0
0.96875	0	0	0	0	0	0	0	0
1.9375	0	0	0	0	0	0	0	0
3.875	0	0	0	0.0190947	0	0.00745823	0.00442549	0.00778104
7.75	0.0597974	0.0110152	0.0103922	0.0344122	0.00243291	0.0643049	0.0303925	0.0267884
15.5	0.0573526	0.0789998	0.0670683	0.0552652	0.0537232	0.116303	0.071452	0.0239286
31	0.119545	0.110881	0.146458	0.112094	0.18065	0.150894	0.136754	0.0275487
