# Supplementary material for: A dedicated diribonuclease resolves a key bottleneck for the terminal step of RNA degradation
Source: eLife. 2019 Jun 21;8:e46313. doi: 10.7554/eLife.46313 (PMC6613908; doi:10.7554/eLife.46313)
Supplement: Figure 4—source data 1. [file elife-46313-fig4-data1.xlsx]

## Sheet: Dinucleotide Panel
	Rep1	Rep2
pGpG	0.975643	0.935285
pApG	0.988624	0.797536
pGpA	0.976608	0.926685
pApA	0.967735	0.950091
pGpU	0.951003	0.953888
pApU	0.894375	0.884237
pGpC	0.85131	0.679975
pApC	0.883626	0.828046
pUpG	0.736082	0.769089
pCpG	0.62581	0.651278
pUpA	0.766664	0.830884
pCpA	0.572457	0.724739
pUpU	0.677198	0.821076
pCpU	0.69479	0.691544
pUpC	0.548605	0.542798
pCpC	0.450693	0.347532
