# Supplementary material for: A dedicated diribonuclease resolves a key bottleneck for the terminal step of RNA degradation
Source: eLife. 2019 Jun 21;8:e46313. doi: 10.7554/eLife.46313 (PMC6613908; doi:10.7554/eLife.46313)
Supplement: Figure 5—source data 1. [file elife-46313-fig5-data1.xlsx]

## Sheet: Sheet1
Figure 5
Panel A
Lysate	Cleaveage product	Time (min)	Replicate 1	Replicate 2	Replicate 3	Average	Stdev
PA14	3-7nt	0	0.941922	0.891625	0.928125	0.920557	0.0259883
		3	0.879816	0.867563	0.899863	0.882414	0.0163059
		5	0.798601	0.779747	0.81727	0.798539	0.0187616
		10	0.5331	0.46631	0.596592	0.532001	0.0651483
		15	0.331825	0.195385	0.375851	0.30102	0.094094
		20	0.211637	0.078232	0.21506	0.16831	0.0780285
		30	0.100967	0.0447405	0.0953296	0.0803456	0.0309635
	Dimer	0	0.023259	0.0288112	0.0270345	0.0263682	0.00283545
		3	0.0183397	0.0186228	0.0127056	0.0165561	0.00333758
		5	0.0186757	0.0195588	0.0125323	0.0169223	0.00382738
		10	0.0318873	0.0273394	0.0155822	0.0249363	0.00841401
		15	0.0249048	0.0247878	0.0180217	0.0225715	0.00394059
		20	0.0205704	0.0148905	0.0176463	0.0177024	0.00284038
		30	0.0153542	0.00831997	0.0181207	0.0139316	0.00505285
	AMP	0	0.0348193	0.0795637	0.0448404	0.0530745	0.0234812
		3	0.101845	0.113814	0.0874318	0.10103	0.0132102
		5	0.182724	0.200694	0.170197	0.184538	0.015329
		10	0.435013	0.506351	0.387825	0.443063	0.0596714
		15	0.643271	0.779827	0.606127	0.676408	0.0914686
		20	0.767792	0.906877	0.767293	0.813988	0.0804453
		30	0.883679	0.946939	0.88655	0.905723	0.0357236
P14 ∆orn	3-7nt	0	0.933249	0.94437	0.904442	0.927353	0.0206067
		3	0.945982	0.949136	0.936338	0.943819	0.00666759
		5	0.907921	0.917193	0.885665	0.903593	0.0162036
		10	0.785	0.795239	0.705456	0.761899	0.0491478
		15	0.621305	0.641356	0.554453	0.605705	0.0455031
		20	0.512793	0.516933	0.397703	0.47581	0.0676742
		30	0.344303	0.361067	0.226875	0.310748	0.0731185
		40	0.199314	0.219228	0.132297	0.183613	0.045543
	Dimer	0	0.0366304	0.0333892	0.0263508	0.0321235	0.0052554
		3	0.0378422	0.0373089	0.0426779	0.0392763	0.00295788
		5	0.0732713	0.0667759	0.090804	0.0769504	0.0124294
		10	0.186049	0.183216	0.269723	0.212996	0.0491473
		15	0.331027	0.324681	0.42062	0.358776	0.0536526
		20	0.429239	0.439709	0.582532	0.483827	0.0856416
		30	0.552273	0.5666	0.751719	0.623531	0.111245
		40	0.0317505	0.0509227	0.0286464	0.0371065	0.0120654
	AMP	0	0.0301208	0.0222408	0.0692077	0.0405231	0.0251521
		3	0.0161755	0.0135552	0.020984	0.0169049	0.00376775
		5	0.0188078	0.0160308	0.0235309	0.0194565	0.00379192
		10	0.0289506	0.0215446	0.0248208	0.0251053	0.0037112
		15	0.047668	0.0339633	0.0249264	0.0355193	0.0114504
		20	0.0664277	0.0433582	0.019765	0.0431836	0.0233318
		30	0.103424	0.0723334	0.0214064	0.0657213	0.0414067
		40	0.768935	0.729849	0.839057	0.77928	0.055334
P14 ∆orn complemented orn	3-7nt	0	0.910507	0.939292	0.920021	0.923273	0.0146655
		3	0.794091	0.778607	0.790779	0.787826	0.00815364
		5	0.573222	0.532964	0.533385	0.546524	0.0231227
		10	0.162352	0.163541	0.150129	0.158674	0.00742378
		15	0.0603498	0.0561595	0.0468677	0.054459	0.00690002
		20	0.0409793	0.0440942	0.034239	0.0397709	0.00503748
		30	0.0341634	0.0336569	0.0294309	0.0324171	0.00259849
	Dimer	0	0.0226538	0.0176755	0.025194	0.0218411	0.00382459
		3	0.0116023	0.0138146	0.0130773	0.0128314	0.00112648
		5	0.014093	0.0221854	0.0217886	0.0193557	0.00456195
		10	0.0198651	0.0221819	0.0166407	0.0195626	0.00278297
		15	0.0125006	0.0156491	0.00964352	0.0125977	0.00300394
		20	0.00985829	0.0186556	0.00790636	0.0121401	0.0057264
		30	0.00893181	0.0142898	0.00715635	0.010126	0.00371363
	AMP	0	0.0668394	0.0430329	0.0547854	0.0548859	0.0119036
		3	0.194306	0.207578	0.196144	0.199343	0.00719109
		5	0.412685	0.444851	0.444827	0.434121	0.0185641
		10	0.817783	0.814277	0.83323	0.821763	0.0100839
		15	0.92715	0.928191	0.943489	0.932943	0.0091475
		20	0.949162	0.93725	0.957855	0.948089	0.0103441
		30	0.956905	0.952053	0.963413	0.957457	0.00569983
P14 ∆orn complemented orn D12A	3-7nt	0	0.926198	0.968031	0.96997	0.954733	0.0201924
		3	0.94153	0.953627	0.940656	0.945271	0.00591958
		5	0.878862	0.903516	0.89793	0.893436	0.010555
		10	0.712139	0.742487	0.70355	0.719392	0.0167026
		20	0.46194	0.426273	0.408448	0.43222	0.0222393
		30	0.31894	0.273556	0.268171	0.286889	0.0227699
		40	0.13489	0.301739	0.0981255	0.178251	0.0885995
	Dimer	0	0.0175264	0.0162979	0.0135015	0.0157753	0.0016842
		3	0.0266015	0.0330536	0.0408133	0.0334895	0.00581015
		5	0.0758058	0.079057	0.0840946	0.0796525	0.00340996
		10	0.228458	0.234244	0.273244	0.245316	0.0198891
		20	0.461924	0.540464	0.563506	0.521965	0.0434845
		30	0.58875	0.677496	0.673793	0.646679	0.0409906
		40	0.0552001	0.112695	0.0713056	0.0797336	0.024217
	AMP	0	0.0562752	0.0156715	0.0165289	0.0294919	0.0189419
		3	0.031869	0.013319	0.0185305	0.0212395	0.00781152
		5	0.0453325	0.0174265	0.0179754	0.0269115	0.0130275
		10	0.0594025	0.023269	0.023206	0.0352925	0.0170483
		20	0.0761357	0.0332626	0.0280465	0.0458149	0.0215455
		30	0.0923104	0.0489483	0.0580358	0.0664315	0.0186714
		40	0.80991	0.585566	0.830569	0.742015	0.110947
Panel B
Lysate	Cleaveage product	Time (min)	Replicate 1	Replicate 2	Replicate 3	Average	Stdev
PA14	pGpG	0	0.966545	0.968284	0.968663	0.967831	0.00112949
		0.5	0.904845	0.832186	0.897163	0.878064	0.0399176
		1	0.861242	0.72737	0.688266	0.758959	0.0907117
		3	0.620814	0.435535	0.508852	0.521734	0.0933089
		5	0.38467	0.168495	0.289209	0.280791	0.108333
		10	0.0683007	0.00849756	0.0242807	0.033693	0.0309927
		20	0.015305	0.00338458	0.0123047	0.0103314	0.00620036
	GMP	0	0.033455	0.0317159	0.0313368	0.0321693	0.00112949
		0.5	0.0951548	0.167814	0.102837	0.121936	0.0399176
		1	0.138758	0.27263	0.311734	0.241041	0.0907117
		3	0.379186	0.564465	0.491148	0.478266	0.0933089
		5	0.61533	0.831505	0.710791	0.719209	0.108333
		10	0.931699	0.991502	0.975719	0.966307	0.0309927
		20	0.984695	0.996615	0.987695	0.989669	0.00620036
P14 ∆orn	pGpG	0	0.987421	0.945876	0.92312	0.952139	0.0326052
		1	0.976189	0.953892	0.939196	0.956426	0.0186262
		3	0.961509	0.96028	0.93	0.950596	0.0178476
		5	0.912676	0.953441	0.928382	0.9315	0.0205608
		10	0.866537	0.953815	0.926744	0.915699	0.044675
		20	0.803038	0.936331	0.908199	0.882523	0.0702579
		30	0.0664505	0.0198635	0.044704	0.0436727	0.0233106
	GMP	0	0.0125787	0.0541244	0.0768804	0.0478612	0.0326052
		1	0.0238112	0.0461076	0.0608042	0.0435744	0.0186262
		3	0.0384907	0.0397204	0.0700001	0.0494037	0.0178476
		5	0.0873242	0.0465587	0.0610511	0.064978	0.0206645
		10	0.133463	0.0461849	0.0732555	0.084301	0.044675
		20	0.196962	0.0636695	0.0918012	0.117477	0.0702579
		30	0.93355	0.980136	0.955296	0.956327	0.0233106
P14 ∆orn complemented orn	pGpG	0	0.934057	0.941008	0.957156	0.944074	0.011851
		0.5	0.0991923	0.0460631	0.0270715	0.0574423	0.0373827
		1	0.0403024	0.00907276	0.00691834	0.0187645	0.0186835
		3	0.0223488	0.00902026	0.00818199	0.0131837	0.00794826
		5	0.0347488	0.00917798	0.00719252	0.0170398	0.0153686
		10	0.0383072	0.00776977	0.00640713	0.0174947	0.018037
		20	0.0436834	0.0077458	0.00419425	0.0185412	0.0218461
	GMP	0	0.0659433	0.0589915	0.0428437	0.0559262	0.011851
		0.5	0.900808	0.953937	0.993082	0.949275	0.0463133
		1	0.959698	0.990927	0.991871	0.980832	0.0183091
		3	0.977651	0.99098	0.991818	0.986816	0.00794826
		5	0.965251	0.990822	0.992807	0.98296	0.0153686
		10	0.961693	0.99223	0.993593	0.982505	0.018037
		20	0.956317	0.992254	0.995806	0.981459	0.0218461
P14 ∆orn complemented orn D12A	pGpG	0	0.987053	0.991935	0.970775	0.983254	0.0110794
		3	0.983087	0.989843	0.953307	0.975412	0.0194392
		5	0.982776	0.985692	0.951365	0.973278	0.019033
		10	0.978205	0.981841	0.931873	0.963973	0.0278585
		20	0.97358	0.975819	0.92016	0.95652	0.0315085
		30	0.956304	0.95909	0.90884	0.941411	0.028242
		40	0.0451044	0.0360444	0.0331228	0.0380905	0.0062474
	GMP	0	0.0129466	0.00806526	0.0292247	0.0167455	0.0110794
		3	0.0169128	0.0101573	0.0466925	0.0245875	0.0194392
		5	0.0172239	0.014308	0.0486351	0.0267224	0.019033
		10	0.0217951	0.0181593	0.0681266	0.036027	0.0278585
		20	0.0264203	0.0241806	0.0798403	0.0434804	0.0315085
		30	0.0436963	0.0409102	0.0911602	0.0585889	0.028242
		40	0.954896	0.963956	0.966877	0.961909	0.0062474
