# Supplementary material for: A dedicated diribonuclease resolves a key bottleneck for the terminal step of RNA degradation
Source: eLife. 2019 Jun 21;8:e46313. doi: 10.7554/eLife.46313 (PMC6613908; doi:10.7554/eLife.46313)
Supplement: Supplementary file 1. [file elife-46313-supp1.xlsx]

## Sheet: Sheet1
Reagent type (species) or resource	Designation	Source or reference	Identifiers	Additional information
DNA primer	5'-ATGACGGGAGCTGATCCTGAAATGC-3'			Forward oligo Q5 site-directed mutagenesis for OrnVc L18A: 5'CTT-->GCT
DNA primer	5'-CTCTAAATCAATCCAAATCAGATTCTGGT-3'			Reverse oligo Q5 site-directed mutagenesis for OrnVc L18A
DNA primer	5'-TCGCGAAAATGGCCGAATGGTGTACC-3'			Forward oligo Q5 site-directed mutagenesis for OrnVc D59A: 5'GAT-->GCC
DNA primer	5'-GTTCGGATTCGGGTTGATGAATC-3'			Reverse oligo Q5 site-directed mutagenesis for OrnVc D59A and W61A
DNA primer	5'-CTTCCATTATGCCTATATTGATGTCAGCAC-3'			Forward oligo Q5 site-directed mutagenesis for OrnVc R130A: 5'CGT-->GCC
DNA primer	5'-TACGCTTCCAAACGCGGCATG-3'			Reverse oligo Q5 site-directed mutagenesis for OrnVc R130A
DNA primer	5'-GTACTTCCATGCTCGTTATATTGATGTCAGCAC-3'			Forward oligo Q5 site-directed mutagenesis for OrnVc Y129A: 5'TAT-->GCT
DNA primer	5'-GCTTCCAAACGCGGCATGTG-3'			Reverse oligo Q5 site-directed mutagenesis for OrnVc Y129A or Y129W
DNA primer	5'-GTACTTCCATTGGCGTTATATTGATGTCAGCAC-3'			Forward oligo Q5 site-directed mutagenesis for OrnVc Y129W: 5'TAT-->TGG
DNA primer	5'-TCGCGAAAATGGATGAAGCTTGTACCACAACG-3'			Forward oligo Q5 site-directed mutagenesis for OrnVc W61A: 5'TGG-->GCT
DNA primer	5'-AATGGATGAATATTGTACCACAACG-3'			Forward oligo Q5 site-directed mutagenesis for OrnVc W61Y: 5'TGG-->TAT
DNA primer	5'-TTCGCGAGTTCGGATTCG-3'			Reverse oligo Q5 site-directed mutagenesis for OrnVc W61Y
DNA primer	5'-GATTTGGATTGCCTTAGAGATGACG-3'			Forward oligo Q5 site-directed mutagenesis for OrnVc D12A: 5'GAT-->GCC
DNA primer	5'-AGATTCTGGTCGCTGAAAGAC-3'			Reverse oligo Q5 site-directed mutagenesis for OrnVc D12A
DNA primer	5'-CAACAGTATTGGTGCTGACAGACGTTTCC-3'			Forward oligo Q5 site-directed mutagenesis for OrnVc Q111A: 5'CAA-->GCT
DNA primer	5'-CCACAAATCGGAGATTTGCCTTCC-3'			Reverse oligo Q5 site-directed mutagenesis for OrnVc Q111A
DNA primer	5'-TACCACAACGGCCACCGCAAGT-3'			Forward oligo Q5 site-directed mutagenesis for OrnVc H66A: 5'CAC-->GCC
DNA primer	5'-CACCATTCATCCATTTTCGCGAG-3'			Reverse oligo Q5 site-directed mutagenesis for OrnVc H66A
DNA primer	5'-GTAAAACAGGTAGCGCTCTTGCTTTGG-3'			Forward oligo Q5 site-directed mutagenesis for OrnVc H158A: 5'CAT-->GCT
DNA primer	5'-TGAACTCTTTTAGCACTTCAGGCTG-3'			Reverse oligo Q5 site-directed mutagenesis for OrnVc H158A
